# Supplementary material
Source: publisher figshare collection journal article supplement (https://gsajournals.figshare.com/ndownloader/files/25674833)
Supplement: Supplementary file 1 [file 25674833]

**Supplementary**

**TABLE S1. *Candida albicans* STRAINS USED IN THIS STUDY**

| **Strain** | **Parent** | **Mating type** | **Description** | **Source** |
| --- | --- | --- | --- | --- |
| CAI4 | SC5314 | **a**/*α* | ura3::imm434/ura3::imm434 | Fonzi and Irwin et al.,1993 |
| SN148 | SN76 | **a/** *α* | *arg4Δ/arg4Δ leu2Δ/leu2Δ his1Δ/his1Δ*  *ura3Δ::imm434/ura3Δ::imm434 iro1Δ::imm434/iro1Δ::imm434* | Noble et al.,  2005 |
| *met30 Δ/Δ* | CAI4 | **a**/*α* | *Met30::URA3/met30::URA3* | This study |
| *met4 Δ/Δ* | CAI4 | **a**/*α* | *met4::URA3/met4::URA3* | This study |
| *met28 Δ/Δ* | CAI4 | **a/***α* | *met4::URA3/met4::URA3* | This study |
| *met4 Δ/ Δ* MET4-VPR | SN148 | **a/***α* | *met4::ARG4/met4::ARG4;leu2/leu2; his3/his3; ura3::imm434/ura3::imm434 ;*RP10::Cip-*ACT1*-cyc-*Met4-VPR* | This study |
| MET4-VPR | SN148 | **a**/*α* | *his/his; leu2/leu2; ura3 imm434/ura3 imm434;arg4/arg4;* RP10::Cip-*ACT1*-cyc-*MET4-VPR* | This study |
| MET28-VPR | SN148 | **a**/*α* | *his/his; leu2/leu2; ura3 imm434/ura3 imm434; arg4/arg4;* RP10::Cip-*ACT1*-cyc-*MET4-VPR* | This study |
